# Supplementary material for: Electronic Mentoring Programs and Interventions for Children and Youth With Disabilities: Systematic Review
Source: PubMed Central journal article supplement (PMC6716434; doi:10.2196/11679), 2018-10-24
Supplement: pediatrics_v1i2e11679_app2.pdf [file pediatrics_v1i2e11679_app2.pdf]

## Multimedia Appendix 2. Overview of studies

| Authors, Year (country)                  | Objectives                                                                                           | <sup>a</sup> Sample characteristics                                                                                                                                      | <sup>a</sup> Disability type | Study Design (measures; theory)                                                                                                                                      | Intervention (delivery and dosage)                                                                                                                                                                             | Key findings (effect size)                                                                                                                                                                                                                                                                                             | Quality rating (AAN) and limitations                           |
|------------------------------------------|------------------------------------------------------------------------------------------------------|--------------------------------------------------------------------------------------------------------------------------------------------------------------------------|------------------------------|----------------------------------------------------------------------------------------------------------------------------------------------------------------------|----------------------------------------------------------------------------------------------------------------------------------------------------------------------------------------------------------------|------------------------------------------------------------------------------------------------------------------------------------------------------------------------------------------------------------------------------------------------------------------------------------------------------------------------|----------------------------------------------------------------|
| Ammerlaan et al. 2014 (Netherlands) [57] | To test the feasibility of an online and face-to-face self-management program                        | <i>Mentees</i> : 19 (aged 17-25; 84% female)<br><i>Mentors</i> : 2 peer leaders (aged 20-30 with rheumatic disease)                                                      | Rheumatic disease            | Mixed methods (perceived usefulness, ease of use, acceptance, adherence)<br>-Theory: Self-efficacy theory                                                            | -Password protected interactive website<br>-6 weeks ; weekly group chat (clarified goals, activities on weekly theme)<br>-Face-to-face version: 3 days<br>-Dosage: 12 hours                                    | -Both the online and face-to-face programs were feasible and helped youth to deal with daily life<br>-Participants found the program easy to use                                                                                                                                                                       | -Majority of sample was female (IV)                            |
| Ammerlaan et al. 2017 (Netherlands) [55] | To investigate the effectiveness of a web-based self-management intervention guided by peer trainers | <i>Mentees</i> : 67 (aged 16-25; 35 intervention (83% female; mean 19.2); 32 control (94% female; mean age 19.1)<br><i>Mentors</i> : young adults with rheumatic disease | Juvenile arthritis           | RCT and qualitative (Dutch arthritis self-efficacy scale, self-management, quality of life, medication use, learning and adherence)<br>-Theory: self-efficacy theory | -Web-based self-management intervention with peer trainers (6 weeks)<br>-Group-based chat section (weekly), home exercises and discussion board<br>-Dosage: approx. 12 hours                                   | -No significant differences on self-efficacy, quality of life, and self-management between experimental and controls<br>-Modeling and sharing were the most recognized themes in experimental group<br>-Goals included improving and maintaining balance, setting and recognizing boundaries, communicating and coping | -High proportion of females<br>-limited details of mentors (I) |
| Barnfather et al. 2011 (Canada) [13]     | To determine the extent to which adolescents used an online peer support intervention                | <i>Mentees</i> : 27 aged 12-18 (mean 14.6) n=27 (15 boys; 12 girls)<br><i>Mentors</i> : 5, same disability type; 22-39 years (3 women; 2 men)                            | Cerebral palsy, spina bifida | Survey and interviews (satisfaction, use and usefulness, social support;<br>-Theory: social support theory                                                           | -6-month online discussion forums<br>-Met once/week in group-based chat room for 1-1.5 hours per session for 25 sessions; email and message boards<br>-Ongoing monitoring and support<br>-Dosage 25-37.5 hours | -Two thirds of participants thought the intervention was fun<br>-Factors influencing the perceived utility of the intervention included typing speed, cognitive skills and need for support<br>-Females were significantly more                                                                                        | - Convenience sample (IV)                                      |

|                                       |                                                                                                                                                                        |                                                                                                                                                                   |                                     |                                                                                                                         |                                                                                                                                                                                                                                       |                                                                                                                                                                                                                                             |                                                                                                           |
|---------------------------------------|------------------------------------------------------------------------------------------------------------------------------------------------------------------------|-------------------------------------------------------------------------------------------------------------------------------------------------------------------|-------------------------------------|-------------------------------------------------------------------------------------------------------------------------|---------------------------------------------------------------------------------------------------------------------------------------------------------------------------------------------------------------------------------------|---------------------------------------------------------------------------------------------------------------------------------------------------------------------------------------------------------------------------------------------|-----------------------------------------------------------------------------------------------------------|
|                                       |                                                                                                                                                                        |                                                                                                                                                                   |                                     |                                                                                                                         |                                                                                                                                                                                                                                       | likely to contribute than males                                                                                                                                                                                                             |                                                                                                           |
| Bell 2010 (US) [68]                   | To explore the role of mentoring youth with blindness                                                                                                                  | <i>Mentees:</i> 49 (Aged 16-26; mean 21.1; 57% females)<br><i>Mentors:</i> adults with blindness                                                                  | Legal blindness                     | Pre-post survey (career decision self-efficacy; Miller Hope Scale; social responsibility)<br>-Theory: n/a               | -Face-to-face activities; phone calls, e-mails, instant messaging (one-to-one)<br>-Dosage: avg. 8 hours per month                                                                                                                     | -Youth who participated in the project had significant increases in career decision-making efficacy (large effect), positive personal hope for the future and positive attitudes about blindness (large effect)                             | -No control group<br>-Do not know which aspects of the program contributed to the outcomes (IV)           |
| Burgstahler & Cronheim 2001 (US) [64] | This study explores whether computer-mediated communication can be used to initiate and sustain peer-peer and mentor-protégé relationships in people with disabilities | <i>Mentees:</i> 49 high school students interested in STEM (20 females; 29 males)<br><i>Mentors:</i> 35 adults (10 females; 25 males; Do-IT scholars; in college) | Various (vision, hearing, learning) | Survey and focus groups (frequency of communication ; what they liked and didn't like<br>-Theory: social support theory | -Do-IT (Disabilities, opportunities, internet working and technology)<br>-Using adaptive technology, internet and sharing resources<br>-Meet face-to-face then online over 2 years<br>-One-to-one and group-based<br>-Dosage: unknown | -Peer-peer and mentor-protégé relationships perform similar functions; however, peer-peer relationships were more personal<br>-Barriers to e-mentoring include: difficulty expressing feelings, lots of messages and technical difficulties | -Demographic details not provided (IV)                                                                    |
| Burgstahler & Doyle 2005 (US) [70]    | To explore gender differences in computer-mediated communication between youth with disabilities and adult mentors                                                     | <i>Mentees:</i> 40 (60% male)<br><i>Mentors:</i> 34 adults with experience in STEM                                                                                | Various types                       | Content analysis of email messages<br>-Theory: n/a                                                                      | -Face-to-face and online (e-mail; part of larger DO-IT (Disabilities, opportunities, internetworking and technology) program<br>-One-to-one and group-based<br>-Dosage: approx. 2 years                                               | -Males sought and provided information about technology and the internet<br>-Females communicated more frequently overall and shared more personal information                                                                              | -Convenience sample<br>-Had a binary view of gender<br>-unclear whether the mentors had a disability (IV) |
| Cantrell et al. 2010 (US) [61]        | To explore the role of e-mentorship in virtual environments                                                                                                            | <i>Mentees:</i> 8 youth with pediatric transplants<br><i>Mentors:</i> 3 students (without disabilities) trained in child psychology                               | Pediatric transplant                | Mixed methods ( qualitative and online log data;<br>-Theory: electronic socio-emotional support theory                  | -Zora virtual world offering psychoeducational support<br>-Dosage: twice a week for 14 weeks (facilitated group-based activities)                                                                                                     | -They discussed bullying, physical appearance, school and pain management<br>-Mentors play an important role in engaging participants                                                                                                       | -Limited description of the methods<br>-Socio-demographics of participants not described (IV)             |

|                                  |                                                                                                                                                                                |                                                                                                                                                                                                   |                                                        |                                                                                                                                          |                                                                                                                                                                                                                                                                       |                                                                                                                                                                                                                                                                                                        |                                                                                                                                                                              |
|----------------------------------|--------------------------------------------------------------------------------------------------------------------------------------------------------------------------------|---------------------------------------------------------------------------------------------------------------------------------------------------------------------------------------------------|--------------------------------------------------------|------------------------------------------------------------------------------------------------------------------------------------------|-----------------------------------------------------------------------------------------------------------------------------------------------------------------------------------------------------------------------------------------------------------------------|--------------------------------------------------------------------------------------------------------------------------------------------------------------------------------------------------------------------------------------------------------------------------------------------------------|------------------------------------------------------------------------------------------------------------------------------------------------------------------------------|
| Cohen & Light 2009 (US) [65]     | To develop, implement and conduct a preliminary evaluation of a small-scale mentorship program for youth who use AAC                                                           | <i>Mentees:</i> 4 (2 males, 2 females; mean age 18.2)<br><i>Mentors:</i> 4 adult AAC users (3 males, 1 female, mean age 36.2)                                                                     | Cerebral palsy with communication disability (use AAC) | Content analysis of email messages, frequency and length of messages and goals attained; satisfaction survey<br>-Theory: n/a             | -Email communication (one-to-one; paired with mentor for 6 months); given instructions on how to structure the relationship<br>-Researchers prompted to communicate regularly<br>-Dosage: ranged from 10-21 weeks                                                     | -Mentoring by successful users of AAC may be effective in easing the transition of younger users of AAC<br>-All pairs maintained consistent communication during the program<br>-The frequency and length of communication may have been influenced by availability of mentor and quality of the match | -Small sample<br>-Non-standardized measures (IV)                                                                                                                             |
| Gorter et al. 2015 (Canada) [56] | To assess use, utility and impact of transition interventions designed to support and empower self-management in youth with chronic conditions during transition to adult care | <i>Mentees:</i> 50 (42% male, mean age 17.9)<br><i>Mentors:</i> Occupational therapist with expertise in transition (identity, age and gender kept anonymous from mentees)                        | Various physical and developmental                     | 4-year mixed-method prospective cohort (frequency of use, utility, impact of transition interventions, goals, interviews<br>-Theory: n/a | -Youth KIT (organizational tool that includes goal setting activities) and online transition mentor (one-to-one and group-based chats and email)<br>-Exposure: 12-47 months<br>-Dosage: total<br>-dosage unknown                                                      | 85% of youth used the KIT at least once<br>-40% of participants engaged in chats with the mentor<br>-82% logged in at least once pre-transfer<br>-Perceived utility of the intervention was modest                                                                                                     | No control group<br>-limited details on sampling strategy (II)                                                                                                               |
| Gregg et al. 2016 (US) [62]      | To understand the provision of e-mentoring to support the educational persistence of students with disabilities at college                                                     | <i>Mentees:</i> 4 (3 females, 1 male)<br><i>Mentors:</i> 4 (2 males, 2 females); faculty, graduate students, business leaders with expertise in STEM (completed 2 online mentor training modules) | Various (learning, visual impairment, physical)        | -Qualitative case study<br>-Theory: n/a                                                                                                  | -Mentors were matched based on interest and learning style<br>-Virtual mentoring (digital voice or text-based communication platforms; virtual reality avatars)<br>-Required to meet at least 10 times per semester, complete project modules; one-to-one<br>-Dosage: | -Virtual environments and social media tool use varied depending on context, accessibility and practical considerations<br>-STEM learning and emotional supports were enhanced when embedded in the practice of e-mentoring<br>-5 persistent                                                           | -Small sample<br>-Mentored pairs meet “at least 10 times per semester”, so no control over dosage per pair<br>-Limited detail on interview data collection and analysis (IV) |

|                                |                                                                                                                                                        |                                                                                                                                                                                      |                                                                      |                                                                                                                                               |                                                                                                                                                                                                                                                                            |                                                                                                                                                                                                                                                                                      |                                                                                                                                                |
|--------------------------------|--------------------------------------------------------------------------------------------------------------------------------------------------------|--------------------------------------------------------------------------------------------------------------------------------------------------------------------------------------|----------------------------------------------------------------------|-----------------------------------------------------------------------------------------------------------------------------------------------|----------------------------------------------------------------------------------------------------------------------------------------------------------------------------------------------------------------------------------------------------------------------------|--------------------------------------------------------------------------------------------------------------------------------------------------------------------------------------------------------------------------------------------------------------------------------------|------------------------------------------------------------------------------------------------------------------------------------------------|
|                                |                                                                                                                                                        |                                                                                                                                                                                      |                                                                      |                                                                                                                                               | unknown                                                                                                                                                                                                                                                                    | constructs (intention to persist, self-determination, self-advocacy, science affect, math affect) informed STEM outcomes                                                                                                                                                             |                                                                                                                                                |
| Gregg et al. 2016 (US) [27]    | To investigate the effectiveness of virtual mentoring for enhancing the persistence of secondary and post-secondary students with disabilities in STEM | <i>Mentees:</i> 189 (42% had mobility / orthopedic impairment)<br><i>Mentors:</i> 33 (faculty, grad students, teachers, business leaders with expertise in STEM; 1 had a disability) | Various (learning, ADHD, autism)                                     | Survey, online log data (aspiration, self-determination, self-advocacy, science self-efficacy, math self-efficacy; self-determination theory) | -4-year e-mentoring program (digital voice communication platform or text-based)<br>-Mentored pairs meet at least 10 times per semester, complete modules, participate in virtual group activities<br>-Virtual environments and social media platforms<br>-Dosage: unknown | -Improved self-determination and self-advocacy<br>-Virtual mentoring enhances the persistence of students with disabilities<br>-Math self-efficacy and math interest improvement were noted for majority of participants<br>-Greatest improvements for females and minority students | -Only 78% completed both the pre-post survey<br>-Mentored pairs meet “at least 10 times per semester”, so no control over dosage per pair (IV) |
| Keane & Russell 2014 (US) [72] | To demonstrate how emerging technologies can bridge the psychological and communication space between students and instructors                         | <i>Mentees:</i> 1 (male)<br><i>Mentors:</i> 1 (adult writing coach)                                                                                                                  | Cerebral palsy                                                       | Case study<br>-Theory: n/a                                                                                                                    | -Cloud ( <i>Google</i> app); <i>Google</i> voice (6 months)<br>-Dosage: unknown                                                                                                                                                                                            | -Developed efficient coaching process adaptable for all student who need assistant at a distance<br>-Facilitated student’s understanding of what changes were needed to school work                                                                                                  | -Limited description of the role of the mentor<br>-Limited detail on interview data collection and analysis (IV)                               |
| Kim & Choi 2017 (Korea) [77]   | To investigate the influence of e-mentoring program for students with disabilities on career                                                           | <i>Mentees:</i> 16 high school students (aged 17-21, mean 17.8; 37.5% male)<br><i>Mentors:</i> 16 university students with disabilities;                                             | Various (physical disability, visual impairment, hearing impairment) | Pre-post survey and interviews (career decision self-efficacy scale)<br>-Theory: n/a                                                          | -8 sessions and online training (one-to-one email and online chat) for 1 hour per week<br>-Activity goals and feedback<br>-Dosage: 8 hours                                                                                                                                 | -Significant improvements in career decision self-efficacy at the end of the program<br>-Participants had better understanding of colleges and majors they were                                                                                                                      | -Did not have control group (level IV)                                                                                                         |

|                                         |                                                                                                                                                           |                                                                                                                                                                                                         |                                                                                 |                                                                                                                                                                           |                                                                                                                                                                    |                                                                                                                                                                                                                                                                                                         |                                                                                                                      |
|-----------------------------------------|-----------------------------------------------------------------------------------------------------------------------------------------------------------|---------------------------------------------------------------------------------------------------------------------------------------------------------------------------------------------------------|---------------------------------------------------------------------------------|---------------------------------------------------------------------------------------------------------------------------------------------------------------------------|--------------------------------------------------------------------------------------------------------------------------------------------------------------------|---------------------------------------------------------------------------------------------------------------------------------------------------------------------------------------------------------------------------------------------------------------------------------------------------------|----------------------------------------------------------------------------------------------------------------------|
|                                         | decision self-efficacy and college preparation                                                                                                            | aged 20-27; mean age 22.8; 42.7% male)<br>Received training                                                                                                                                             |                                                                                 |                                                                                                                                                                           |                                                                                                                                                                    | interested in, improved knowledge about admissions procedures                                                                                                                                                                                                                                           |                                                                                                                      |
| Kim-Rupnow & Burgstahler 2004 (US) [69] | To explore perceptions of students with disabilities regarding the value of technology-based support activities on postsecondary education and employment | <i>Mentees:</i> 75 (52% male; aged 18-26; majority under 23)<br><i>Mentors:</i> adults with experience in STEM                                                                                          | Various                                                                         | Retrospective survey (motivations for post-secondary, employment, social skills, advocacy skills, self-esteem)<br>-Theory: n/a                                            | -Part of DO-IT mentor program (face-to-face and online (email))<br>-One-to-one and group-based<br>-Dosage: approx. 2 years                                         | -participants reported short and long-term growth in their level of preparation for college and employment and increased self-advocacy and social skills<br>-participants rated computer and internet use the most valuable activity for developing their social, academic or career skills             | -Unclear whether mentors had a disability<br>-No control group (IV)                                                  |
| Kohut et al. 2016 (Canada) [73]         | To develop and test the feasibility, acceptability and impact of the iPeer2Peer program                                                                   | <i>Mentees:</i> 28 (aged 12-18, mean 14.8); 93% female); 12 intervention, 16 control)<br><i>Mentors:</i> trained youth with chronic pain, aged 18-25 who have learned to successfully manage their pain | Chronic pain (neuropathic, widespread, abdominal, secondary to chronic disease) | Pilot RCT, wait-list controls<br>-Feasibility, adherence, satisfaction, recalled pain inventory, daily functioning (conceptual framework for peer support in health care) | -10 Skype video calls (one-to-one) (20-30 minutes) over 8 weeks<br>-Modelling and reinforcement by peers<br>-Dosage: 2.6 to 5 hours                                | -The iPeer2Peer program was feasible and acceptable provided that adolescents were given more time to complete all the calls<br>-They liked the flexibility of skype calls<br>-Youth in the intervention had significant improvement in self-management skills and coping efforts were more successful. | -Intensive intervention that requires significant time commitment<br>-Small sample size<br>-Mostly female sample (I) |
| Kohut et al. 2018 (Canada) [75]         | To determine the topics of discussion during open-ended peer mentoring between youth with chronic                                                         | <i>Mentees:</i> 28 (93% female; mean age 14.8; 57% with juvenile arthritis)<br><i>Mentors:</i> 11 (90% female; 53% with juvenile arthritis; mean                                                        | Various (57% juvenile arthritis)                                                | Qualitative content analysis (conceptual framework for peer support in health care)<br>-Theory: n/a                                                                       | -52 calls (7 mentor-mentee pairings) (part of pilot RCT)<br>-Asked to meet 10 times via Skype (one-to-one) calls over the course of 2-3 months<br>-Dosage: unknown | -Themes included: illness impact (relationships, school/work, self-identity, personal stories), self-management (adherence, transition to adult care, coping), non-illness related                                                                                                                      | -Majority female participants (IV)                                                                                   |

|                                   |                                                                                                    |                                                                                                                                                                          |                                     |                                                                                                                                          |                                                                                                                                                                                                                                     |                                                                                                                                                                                                                                                                                                           |                                                                                        |
|-----------------------------------|----------------------------------------------------------------------------------------------------|--------------------------------------------------------------------------------------------------------------------------------------------------------------------------|-------------------------------------|------------------------------------------------------------------------------------------------------------------------------------------|-------------------------------------------------------------------------------------------------------------------------------------------------------------------------------------------------------------------------------------|-----------------------------------------------------------------------------------------------------------------------------------------------------------------------------------------------------------------------------------------------------------------------------------------------------------|----------------------------------------------------------------------------------------|
|                                   | conditions                                                                                         | age 17.9)                                                                                                                                                                |                                     |                                                                                                                                          |                                                                                                                                                                                                                                     | issues (school goals, hobbies and social environments)<br>-Mentors provided informational, appraisal and emotional support to adolescents                                                                                                                                                                 |                                                                                        |
| Kramer et al. 2018 (US) [71]      | To explore the feasibility of e-mentoring for transition age youth with disabilities               | <i>Mentees:</i> 42 (aged 14-22; 61% male)<br><i>Mentors:</i> 9 (with a disability; mean age 22.6; 4 males; 5 females; mentors received training and ongoing supervision) | Intellectual and developmental      | Pre-post survey; content analysis of calls<br>-Fidelity and engagement, feasibility and acceptability<br>-Theory: social learning theory | -One-to-one mentoring (instrumental e-mentoring calls, email, online chat)<br>-12 weeks, 8 calls which paralleled group session curriculum<br>-31 peer-mentoring dyads<br>-Dosage: unknown                                          | Mentees attended 87% of calls and engaged during 94% of call objectives (engaged in practice problem-solving)<br>-Mentors achieved 87% of objectives<br>-Significant relationship between use of mentoring supports and fidelity<br>-Intervention is suitable and acceptable to mentees with disabilities | -Program was labour intensive and expensive (IV)                                       |
| Mastropieri et al. 2001 (US) [67] | To explore the role of e-mentors for elementary students with disabilities                         | <i>Mentees:</i> 17 elementary students (82% male)<br><i>Mentor:</i> university student without disability                                                                | Learning and cognitive disabilities | -analysis of e-mail messages<br>-Theory: n/a                                                                                             | -Email (one-to-one)<br>-Dosage: 3 months                                                                                                                                                                                            | -Significant improvement in written communication (# of sentences) from beginning to end of mentoring                                                                                                                                                                                                     | -Little information given about the mentors<br>-Did not use standardized measures (IV) |
| Narad et al. 2018 (US) [60]       | To describe the social participation and navigation (SPAN) program and report preliminary outcomes | <i>Mentees:</i> 4 (mean age 15; 3 females, 1 male)<br><i>Mentors:</i> 4 (graduate students; weekly group supervision by clinical psychologist and OT)                    | Traumatic brain injury              | Feasibility study pre-post (social and behavior functioning; feasibility and acceptability)<br>-Theory: n/a                              | -Mobile app, online didactic information (interactive website) and peer coaching;<br>-Met weekly with mentor (one-to-one) via video conference (Skype)<br>developed goals and plans to achieve them<br>-4weeks<br>-Dosage: 1 hour a | -SPAN program was well received (feasible and good utility)<br>-Youth used the app to define and achieve goals<br>-Youth self-report measures medium to large effect)                                                                                                                                     | -Small sample (IV)                                                                     |

|                                        |                                                                                                                    |                                                                                                                                                                                 |                                                |                                                                                          |                                                                                                                                                                                                                                                                                                     |                                                                                                                                                                                                                                                                                                                                                                                                               |                                                                             |
|----------------------------------------|--------------------------------------------------------------------------------------------------------------------|---------------------------------------------------------------------------------------------------------------------------------------------------------------------------------|------------------------------------------------|------------------------------------------------------------------------------------------|-----------------------------------------------------------------------------------------------------------------------------------------------------------------------------------------------------------------------------------------------------------------------------------------------------|---------------------------------------------------------------------------------------------------------------------------------------------------------------------------------------------------------------------------------------------------------------------------------------------------------------------------------------------------------------------------------------------------------------|-----------------------------------------------------------------------------|
|                                        |                                                                                                                    |                                                                                                                                                                                 |                                                |                                                                                          | week for 4 weeks<br>(total around 4<br>hours)                                                                                                                                                                                                                                                       |                                                                                                                                                                                                                                                                                                                                                                                                               |                                                                             |
| Parkyn & Coveney 2013 (Australia) [58] | To explore the value of “MD Mafia” online group for youth with muscular dystrophy                                  | <i>Mentees:</i> 12 (males aged 14-17; 12 parents)<br><i>Mentors:</i> adult (male occupational therapist)                                                                        | Muscular dystrophy                             | Qualitative content analysis of discussion forum<br>-Theory: symbolic interaction theory | -Password protected online interactive group activities and discussion forum matched to youth’s age, interest and skills (1 hour x 4 times/year)<br>-Dosage: 4 hours                                                                                                                                | -Intervention has a strong collective identity (reflecting ideals of masculinity)<br>-Group provides opportunity for socialization in a safe environment                                                                                                                                                                                                                                                      | -Lack of details about the intervention<br>-all male sample (IV)            |
| Shpigelman et al. 2009 (Israel) [19]   | To evaluate an e-mentoring intervention program providing social and emotional support for youth with disabilities | <i>Mentees:</i> 13 (aged 15-20 (mean 17.5; 5 males; 8 females)<br><i>Mentors:</i> 7 (2 males; 5 females with a disability; received 2-hour training; supervised by researchers) | Physical, emotional, behavioural, intellectual | Qualitative content analysis<br>-Theory: electronic socio-emotional support (ESES)       | -Youth were matched based on gender, shared interests and hobbies (one-to-one)<br>-Intervention involved 4 stages (personal acquaintance, moderated communication, online activities, saying goodbye) taking 8 months<br>-Dosage: send at least 2 messages per week via email for approx. 8 months. | -Findings support the usability and utility of an e-mentoring intervention and the ESES conceptual framework<br>-Mentors sent mean of 38.8 messages compared to mean of 27.3 messages sent by mentees<br>-Themes of the messages included perceptions, attitudes and experiences of mentors, the e-mentoring process, participants role in the process, feelings experienced and duration of the intervention | -Higher proportion of females<br>-Small sample<br>-No comparison group (IV) |
| Shpigelman & Gill 2013 (US) [47]       | To explore the characteristics of unsuccessful e-mentoring relationships for youth with disabilities               | <i>Mentees:</i> 6 (aged 15-20)<br><i>Mentors:</i> 6 (aged 22-28; 67% female with a disability); Serve as role models; share life experiences and focus on positive              | Developmental, physical, emotional, behavioral | Qualitative thematic analysis<br>-Theory: n/a                                            | -E-mentor intervention to provide social and emotional support for youth with disabilities through asynchronous (one-to-one) e-mail for 8 months (at least 2 messages per week and meet                                                                                                             | -Unsuccessful mentoring was associated with a more formal style and distant tone; successful mentoring included informal and supportive style                                                                                                                                                                                                                                                                 | -Training of mentors not mentioned<br>-Small, sub-sample (IV)               |

|                                   |                                                                                                                                 |                                                                                                                                                                                                  |                                                    |                                                                                                                                                                                                            |                                                                                                                                                                                                                                                                                   |                                                                                                                                                                                                                                                                                                                                                                                                |                                                                                                                 |
|-----------------------------------|---------------------------------------------------------------------------------------------------------------------------------|--------------------------------------------------------------------------------------------------------------------------------------------------------------------------------------------------|----------------------------------------------------|------------------------------------------------------------------------------------------------------------------------------------------------------------------------------------------------------------|-----------------------------------------------------------------------------------------------------------------------------------------------------------------------------------------------------------------------------------------------------------------------------------|------------------------------------------------------------------------------------------------------------------------------------------------------------------------------------------------------------------------------------------------------------------------------------------------------------------------------------------------------------------------------------------------|-----------------------------------------------------------------------------------------------------------------|
|                                   |                                                                                                                                 | aspects of disability)                                                                                                                                                                           |                                                    |                                                                                                                                                                                                            | face-to face 3 times)<br>-Youth were matched to mentor based on gender, shared interests and hobbies<br>-Dosage: unknown                                                                                                                                                          |                                                                                                                                                                                                                                                                                                                                                                                                |                                                                                                                 |
| Stewart et al. 2011 (Canada) [59] | To explore the perceptions of adolescents with physical disabilities in an online intervention                                  | <i>Mentees:</i> 22 (aged 12-18)<br><i>Mentors:</i> 5 (3 female, 2 male aged 22-39 with cerebral palsy or spina bifida)                                                                           | Physical disability (cerebral palsy, spina bifida) | Survey and interviews (loneliness and social dissatisfaction scale, self-report coping scale, sense of community scale, self-perception profile and children's inventory of social support<br>-Theory: n/a | -Met weekly online in group-based chat rooms for 60-90 minutes for 25 group sessions over 6 months<br>-Topics included independent living, health concerns, bullying, making friends, career planning, travelling, sports and building relationships<br>-Dosage: 25 to 37.5 hours | -More contact with other teens; decreased loneliness;<br>-Significant increase in acceptance and confidence;<br>increase in sense of community<br>-On average youth attended 8.5 group sessions                                                                                                                                                                                                | -Pilot study; small sample<br>-No control group<br>-No use of verification procedures for qualitative data (IV) |
| Stinson et al. 2016 (Canada) [74] | To examine the feasibility and acceptability of an online peer mentoring program (iPeer2Peer) for youth with juvenile arthritis | <i>Mentees:</i> 30 (aged 12-18, mean 14.3; 97% female)<br><i>Mentors:</i> 6 (aged 16-25, mean 18.8, 83% female who successfully manage their juvenile arthritis, screened and trained (2.5 days) | Juvenile arthritis                                 | Pilot RCT (wait-list controls) (feasibility, acceptability, self-management, self-efficacy, pain, social support and quality of life)<br>-Theory: n/a                                                      | -Connected 10 times (20-30 minutes/time) over 8 weeks using Skype (one-to-one) video calls<br>-Dosage: 2.5 to 5 hours                                                                                                                                                             | -Half of the participants completed the 10 calls within 8 weeks<br>-Average call length was twice the required amount<br>-Participants reported satisfaction with the program and would recommend to their peers<br>-Mean engagement level was 8.53/10<br>-Improvement in perceived ability to manage arthritis compared to controls<br>-There is a need for flexibility and individualization | -Majority female sample (I)                                                                                     |



|                            |                                                                                                       |                                                                                                     |                                                   |                                                                                                                                                                       |                                                                                                                                                                            |                                                                                                                                                                                                                                                                                           | in the iPeer2Peer program                                                                                                                               |
|----------------------------|-------------------------------------------------------------------------------------------------------|-----------------------------------------------------------------------------------------------------|---------------------------------------------------|-----------------------------------------------------------------------------------------------------------------------------------------------------------------------|----------------------------------------------------------------------------------------------------------------------------------------------------------------------------|-------------------------------------------------------------------------------------------------------------------------------------------------------------------------------------------------------------------------------------------------------------------------------------------|---------------------------------------------------------------------------------------------------------------------------------------------------------|
| Todd et al. 2016 (US) [63] | To explore the relevance of e-mentoring for competency-based education for students with disabilities | <i>Mentees:</i> 97 (secondary and post-secondary students)<br><i>Mentors:</i> “various backgrounds” | Various (physical, sensory, ASD, mobility, other) | Pre-post survey (communication methods, interactions, self-advocacy, self-determination, intention to persist, science and math anxiety)<br>-Theory: theory of change | -Georgia STEM alliance uses virtual worlds, online and smartphone technologies; individual and group activities<br>-4 years (surveyed twice each year)<br>-Dosage: unknown | -Participants reported higher frequency of using communication platforms that they are already acquainted with including e-mail, telephone, SMS text message<br>-Improvements in internal characteristics related to persistence in STEM education<br>-Self-advocacy had the highest gain | -No control group<br>-Limited socio-demographic details of participants<br>-Limited details on who the mentors are and what training they received (IV) |

<sup>a</sup> Note: only the findings related to the objectives of this review were reported.
