# Supplementary material for: Electronic Mentoring Programs and Interventions for Children and Youth With Disabilities: Systematic Review
Source: PubMed Central journal article supplement (PMC6716434; doi:10.2196/11679), 2018-10-24
Supplement: pediatrics_v1i2e11679_app3.pdf [file pediatrics_v1i2e11679_app3.pdf]

### Multimedia Appendix 3. Overall scores using the Standard Quality Assessment Criteria [53] for quantitative studies

| <b>Study</b>                       | <b>1</b> | <b>2</b> | <b>3</b> | <b>4</b> | <b>5</b> | <b>6</b> | <b>7</b> | <b>8</b> | <b>9</b> | <b>10</b> | <b>11</b> | <b>12</b> | <b>13</b> | <b>14</b> | <b>Total</b>                |
|------------------------------------|----------|----------|----------|----------|----------|----------|----------|----------|----------|-----------|-----------|-----------|-----------|-----------|-----------------------------|
| Ammerlaan et al. 2014 [57]         | 2        | 1        | 1        | 2        | NA       | NA       | NA       | 1        | 0        | 0         | 0         | 0         | 0         | 1         | <b>8/22</b><br><b>0.36</b>  |
| Ammerlaan et al. 2017 [55]         | 2        | 2        | 2        | 2        | 2        | 0        | 0        | 2        | 2        | 2         | 2         | 1         | 2         | 2         | <b>23/28</b><br><b>0.82</b> |
| Bell 2010 [68]                     | 2        | 1        | 1        | 2        | NA       | NA       | NA       | 2        | 2        | 1         | 2         | 1         | 2         | 2         | <b>18/22</b><br><b>0.81</b> |
| Cantrell et al. 2010 [61]          | 1        | 1        | 1        | 0        | NA       | NA       | NA       | 1        | 1        | NA        | NA        | 0         | 0         | 1         | <b>6/18</b><br><b>0.33</b>  |
| Cohen & Light 2009 [65]            | 2        | 2        | 1        | 2        | NA       | NA       | NA       | 2        | 1        | NA        | NA        | 1         | 0         | 1         | <b>12/18</b><br><b>0.66</b> |
| Gorter et al. 2015 [56]            | 1        | 1        | 1        | 2        | NA       | NA       | NA       | 2        | 2        | 2         | 2         | NA        | 2         | 2         | <b>17/20</b><br><b>0.85</b> |
| Gregg et al. 2016 [27]             | 2        | 1        | 1        | 1        | NA       | NA       | NA       | 2        | 1        | 2         | 0         | NA        | 2         | 2         | <b>14/20</b><br><b>0.70</b> |
| Kim & Choi 2017 [77]               | 2        | 1        | 2        | 2        | NA       | NA       | NA       | 2        | 1        | 2         | 1         | 1         | 2         | 2         | <b>18/22</b><br><b>0.81</b> |
| Kim-Rupnow & Burgstahler 2004 [69] | 2        | 1        | 1        | 1        | NA       | NA       | NA       | 1        | 2        | 1         | 1         | 1         | 2         | 2         | <b>15/22</b><br><b>0.68</b> |
| Kohut et al. 2016 [73]             | 2        | 2        | 2        | 2        | 2        | NA       | NA       | 2        | 2        | 2         | 2         | 1         | 2         | 2         | <b>23/24</b><br><b>0.96</b> |
| Mastropieri et al. 2001 [67]       | 2        | 1        | 1        | 1        | NA       | NA       | NA       | 1        | 1        | 1         | 0         | 0         | 1         | 2         | <b>11/22</b><br><b>0.50</b> |
| Narad 2018 [60]                    | 2        | 2        | 1        | 1        | NA       | NA       | NA       | 2        | 1        | 2         | 1         | 1         | 2         | 1         | <b>16/22</b><br><b>0.73</b> |
| Stewart 2011 [59]                  | 2        | 1        | 1        | 1        | NA       | NA       | NA       | 2        | 1        | 1         | 2         | 1         | 1         | 2         | <b>15/22</b><br><b>0.68</b> |
| Stinson et al. 2016 [74]           | 2        | 1        | 2        | 1        | 2        | 2        | NA       | 2        | 2        | 1         | 2         | 2         | 2         | 2         | <b>23/26</b><br><b>0.88</b> |

<sup>a</sup> Scoring: 2= yes, 1= partial, 0=no, n/a= not applicable

<sup>b</sup> Note: checklist for assessing quality of qualitative studies see Kmet et al. [53] for full description of items.
